# Supplementary material for: Production of Acid and Rennet-Coagulated Cheese Enriched by Olive (Olea europaea L.) Leaf Extract—Determining the Optimal Point of Supplementation and Its Effects on Curd Characteristics
Source: MDPI journal article supplement (doi:10.3390/foods13040616), 2024-02-18
Supplement: s1 [file s1]

**Table S2.** 3way ANOVA results for textural parameters of OLE supplemented cheese curds.

| Source of Variation                                                          | Hardness | Gumminess | Chewiness | Springiness |
|------------------------------------------------------------------------------|----------|-----------|-----------|-------------|
| Confidence level 0.05 (95% confidence interval)                              | p value  |           |           |             |
| Effective concentration of OLE                                               | 0.1595   | 0.7266    | 0.0973    | 0.2684      |
| Coagulation method                                                           | <0.0001  | <0.0001   | 0.0064    | <0.0001     |
| Moment of OLE addition                                                       | <0.0001  | <0.0001   | <0.0001   | 0.1003      |
| Effective concentration of OLE x Coagulation method                          | 0.1148   | 0.0348    | 0.0099    | 0.0872      |
| Effective concentration of OLE x Moment of OLE addition                      | 0.6362   | 0.9929    | 0.8133    | 0.1966      |
| Coagulation method x Moment of OLE addition                                  | <0.0001  | <0.0001   | 0.0002    | 0.0255      |
| Effective concentration of OLE x Coagulation method x Moment of OLE addition | 0.1519   | 0.1653    | 0.2121    | 0.0295      |
