# Supplementary material for: Production of Acid and Rennet-Coagulated Cheese Enriched by Olive (Olea europaea L.) Leaf Extract—Determining the Optimal Point of Supplementation and Its Effects on Curd Characteristics
Source: MDPI journal article supplement (doi:10.3390/foods13040616), 2024-02-18
Supplement: s1 [file s1]

**Table S1.** 3way ANOVA results for physicochemical characteristics of OLE supplemented cheese curds.

| Source of Variation                                                          | pH      | % LA    | Aw      | Fat (%) | Moisture (%) | Protein (%) | SFA*    | FDM**   | Total Solids (%) | $\Delta E^*$ |
|------------------------------------------------------------------------------|---------|---------|---------|---------|--------------|-------------|---------|---------|------------------|--------------|
| Confidence level 0.05 (95% confidence interval)                              | p value |         |         |         |              |             |         |         |                  |              |
| Effective concentration of OLE                                               | 0.0050  | <0.0001 | 0.0058  | <0.0001 | <0.0001      | <0.0001     | <0.0001 | 0.0001  | <0.0001          | <0.0001      |
| Coagulation method                                                           | <0.0001 | <0.0001 | 0.6646  | <0.0001 | <0.0001      | <0.0001     | <0.0001 | <0.0001 | <0.0001          | 0.7783       |
| Moment of OLE addition                                                       | <0.0001 | <0.0001 | <0.0001 | 0.0001  | 0.0012       | 0.0564      | 0.0063  | <0.0001 | 0.0012           | 0.0024       |
| Effective concentration of OLE x Coagulation method                          | 0.0004  | <0.0001 | 0.0132  | 0.2868  | 0.6071       | 0.7443      | 0.0002  | 0.0660  | 0.6071           | 0.2157       |
| Effective concentration of OLE x Moment of OLE addition                      | <0.0001 | <0.0001 | 0.0027  | 0.0373  | 0.1040       | 0.3971      | 0.0020  | 0.0016  | 0.1040           | 0.0016       |
| Coagulation method x Moment of OLE addition                                  | <0.0001 | <0.0001 | 0.5170  | 0.0973  | 0.9291       | 0.0078      | 0.1948  | <0.0001 | 0.9291           | 0.0034       |
| Effective concentration of OLE x Coagulation method x Moment of OLE addition | 0.0087  | <0.0001 | 0.0162  | 0.0312  | 0.0476       | 0.0070      | 0.1324  | 0.0012  | 0.0476           | <0.0001      |

\*SFA (Saturated Fatty Acids)

\*\*FDM (Fat in Dry Matter)
