# Supplementary material for: Production of Acid and Rennet-Coagulated Cheese Enriched by Olive (Olea europaea L.) Leaf Extract—Determining the Optimal Point of Supplementation and Its Effects on Curd Characteristics
Source: MDPI journal article supplement (doi:10.3390/foods13040616), 2024-02-18
Supplement: s1 [file s1]

**Table S3.** 3way ANOVA results for TPs, TFs and AA in cheese curds.

| Source of Variation                                                          | Total Phenols | Total flavonoids | Antioxidant activity |
|------------------------------------------------------------------------------|---------------|------------------|----------------------|
| Confidence level 0.05 (95% confidence interval)                              |               | p value          |                      |
| Effective concentration of OLE                                               | <0.0001       | <0.0001          | <0.0001              |
| Coagulation method                                                           | 0.3003        | <0.0001          | <0.0001              |
| Moment of OLE addition                                                       | 0.0006        | <0.0001          | <0.0001              |
| Effective concentration of OLE x Coagulation method                          | <0.0001       | <0.0001          | <0.0001              |
| Effective concentration of OLE x Moment of OLE addition                      | <0.0001       | <0.0001          | <0.0001              |
| Coagulation method x Moment of OLE addition                                  | <0.0001       | <0.0001          | <0.0001              |
| Effective concentration of OLE x Coagulation method x Moment of OLE addition | <0.0001       | <0.0001          | <0.0001              |
